# Supplementary material for: Large-scale analysis of post-translational modifications in E. coli under glucose-limiting conditions
Source: PubMed Central journal article supplement (PMC5392934; doi:10.1186/s12864-017-3676-8), 2017-04-17

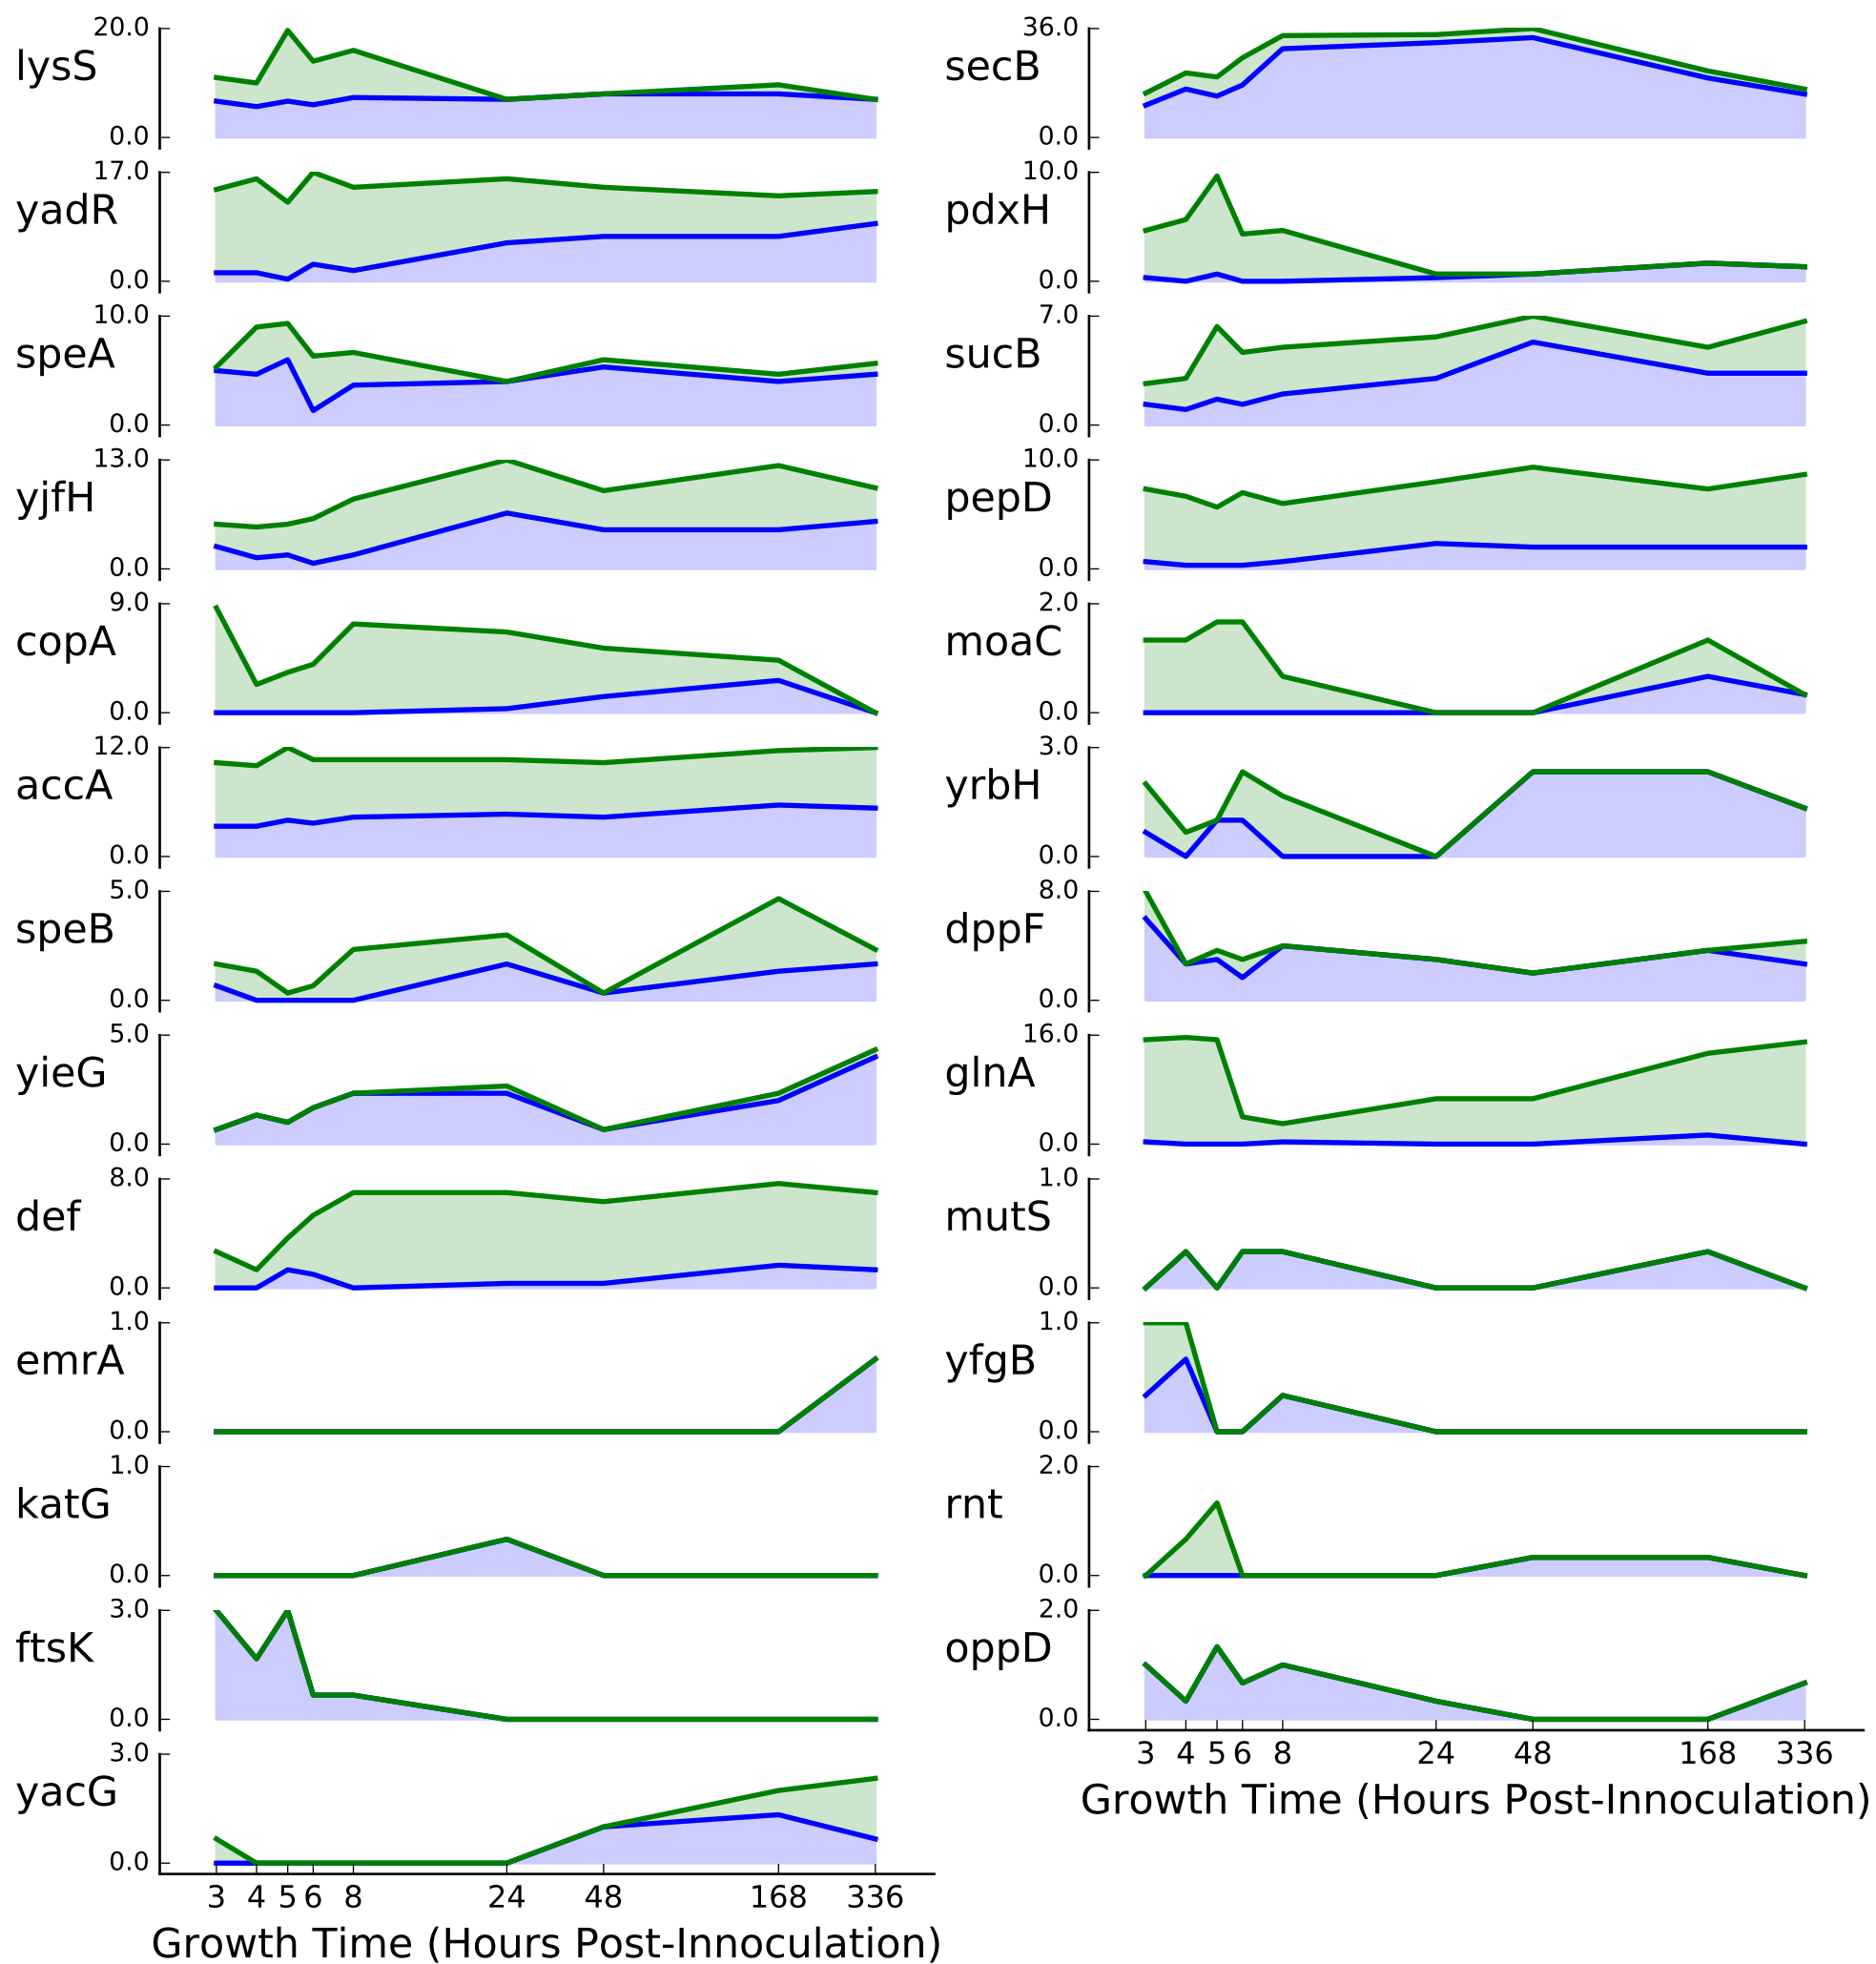

Supplement: 12864_2017_3676_MOESM3_ESM.pdf [file 12864_2017_3676_MOESM3_ESM.pdf]
